# Supplementary material for: Autophagy disruption reduces mTORC1 activation leading to retinal ganglion cell neurodegeneration associated with glaucoma
Source: PubMed Central journal article supplement (PMC9881969; doi:10.1101/2023.01.04.522687), 2023-01-04
Supplement: NIHPP2023.01.04.522687V1-supplement-1.pdf [file NIHPP2023.01.04.522687V1-supplement-1.pdf]

1194 **Supporting information**

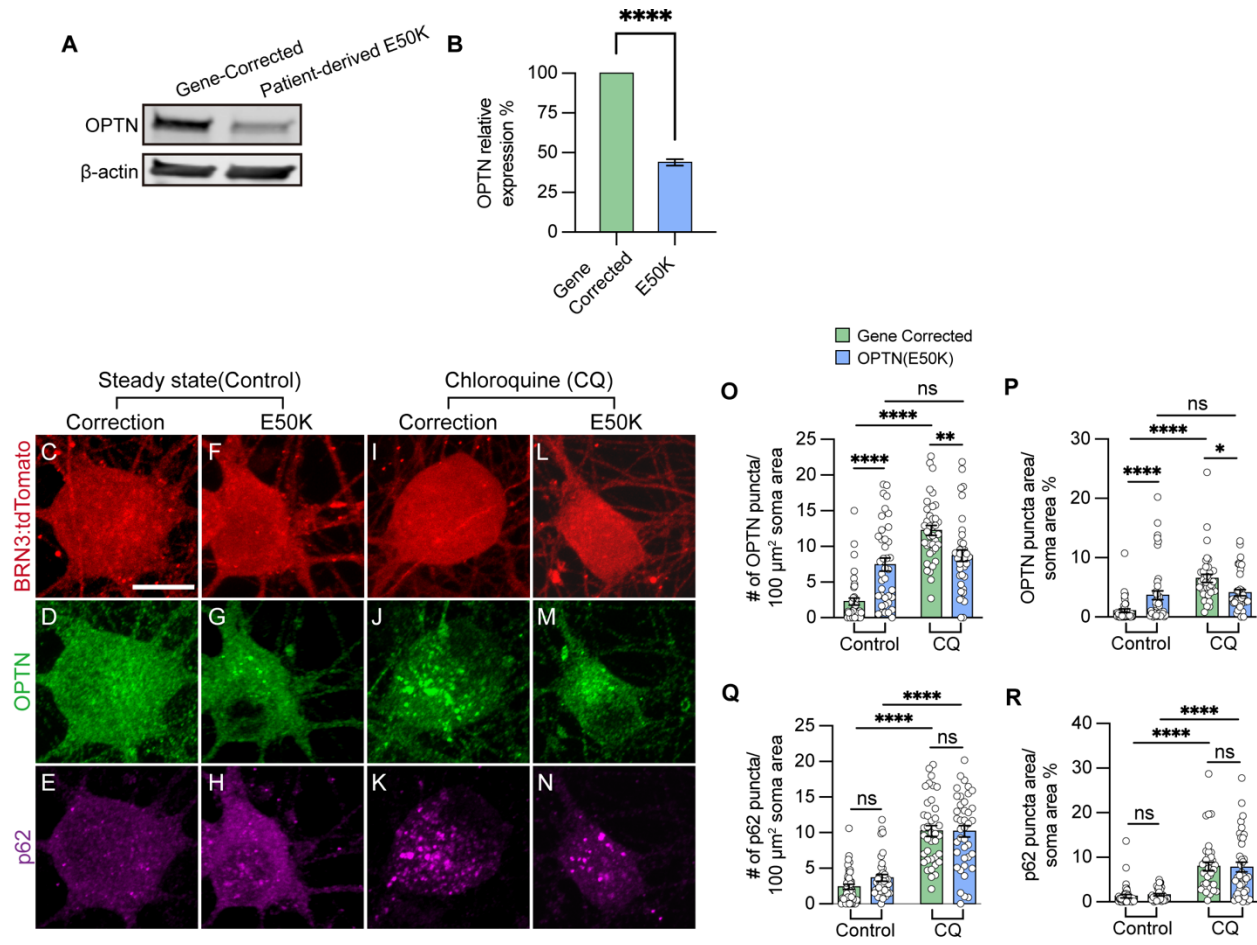

1195

1196 **Supplemental Figure 1. Confirmation of changes in OPTN levels in RGC-derived from**  
 1197 **patient-specific iPSCs with OPTN(E50K) mutation compared to corresponding isogenic**  
 1198 **control line.** (A-B) Western blot of OPTN relative to  $\beta$ -actin in patient-derived OPTN(E50K) and  
 1199 gene-corrected isogenic control iPSC-RGCs (n=5 for each WT and E50K; t-test, \*\*\*\*p<0.0001).  
 1200 (C-N) Immunostaining revealed the aggregation of OPTN and p62 puncta in BRN3:tdTomato  
 1201 iPSC-RGCs in patient-derived OPTN(E50K) mutant and gene-corrected isogenic control lines  
 1202 after steady state (control) (C-H) and chloroquine (CQ) treatment (I-N). Scale bar: 10  $\mu$ m. (O-R)  
 1203 Quantification of OPTN puncta (O and P) or p62 puncta (Q and R) in iPSC-RGC (n=3 biological  
 1204 replicates using Ctrl-WT n=42, Ctrl-E50K n=39, CQ-WT n=38 and CQ-E50K n=40 technical

1205 replicates; One-way ANOVA, Tukey post hoc test. \*\*\*\*p<0.0001, \*\*p<0.01, \*p<0.05, ns= not  
1206 significant). Data are all represented as mean values  $\pm$  S.E.M.

1207 **Supplemental figure 1-source data 1. The alternation of OPTN protein in gene corrected**  
1208 **and patient derived-OPTN(E50K) mutation hPSC-RGCs.**

1209

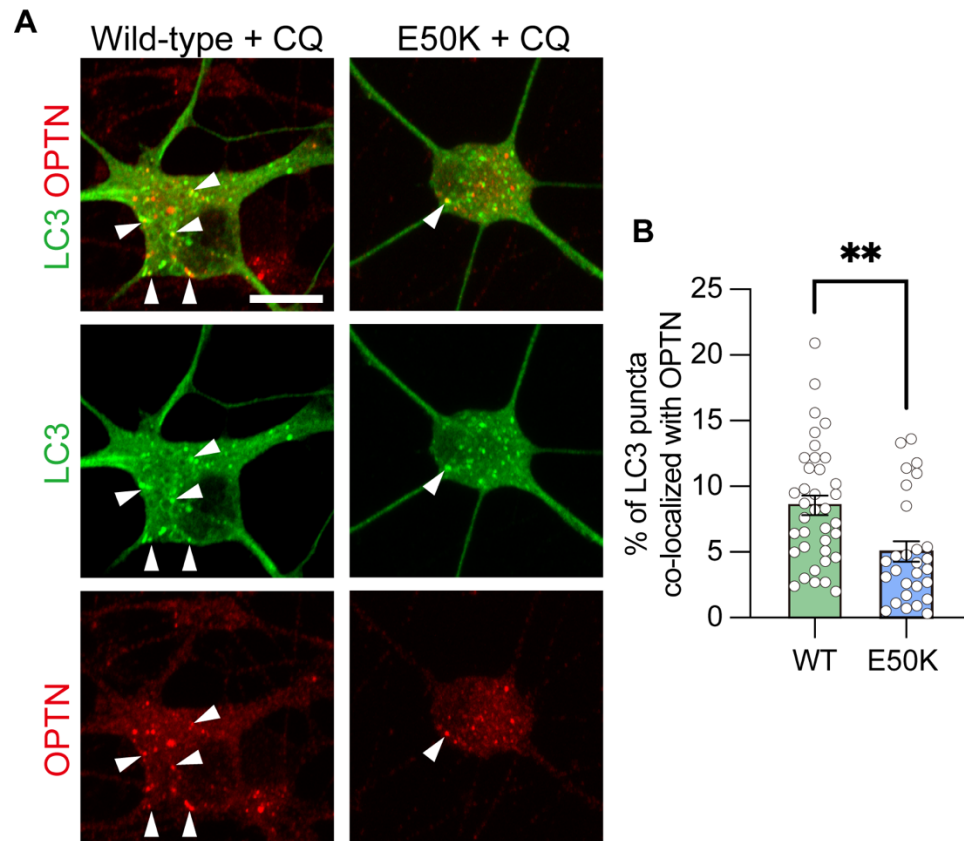

1210

1211 **Supplemental Figure 2. Confirmation of reduced recruitment of LC3 by OPTN in patient-**

1212 **derived OPTN(E50K) iPSC-RGCs after chloroquine treatment.** (A) Representative images of

1213 OPTN and LC3 localization in patient-derived iPSC-RGCs from wild-type and OPTN(E50K) cell

1214 lines after chloroquine treatment. White arrows identify puncta colocalized with OPTN and LC3.

1215 (B) Quantification of colocalization between OPTN and LC3 in patient-derived iPSC-RGCs (n=3

1216 biological replicates using WT n=37 and E50K n=28 technical replicates; t-test, \*\*p>0.005).

1217 Scale bar: 10  $\mu$ m. Data are all represented as mean values  $\pm$  S.E.M.

1218

1219

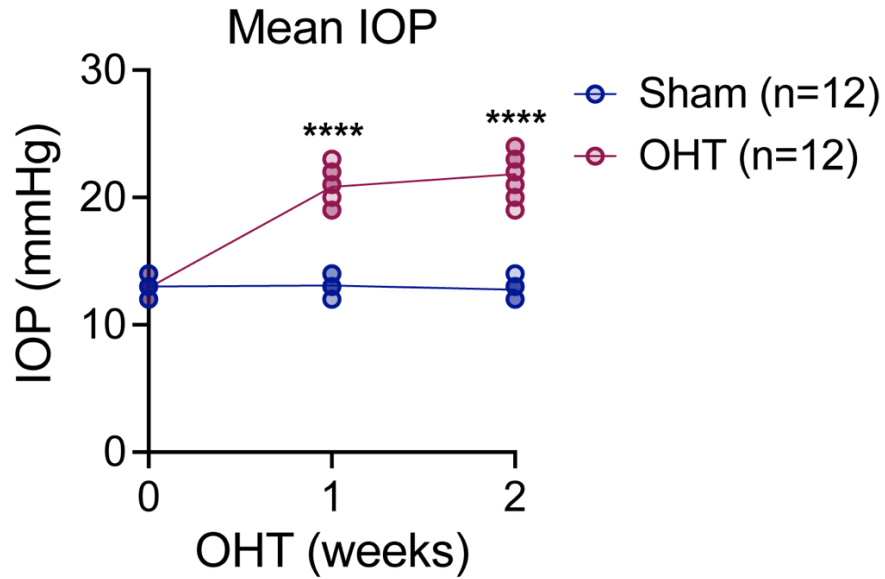

1220

1221 **Supplemental Figure 3. Elevation of intraocular pressure in an ocular hypertension**

1222 **glaucoma model.** Maintained elevation of intraocular pressure in mouse eyes following the

1223 injection of magnetic microbeads into the mouse anterior chamber, compared to sham-injected

1224 controls. Two-way ANOVA with Tukey's multiple comparison pos hoc test, \*\*\*\*p < 0.0001,

1225 n = 12 mice/group.

1226

1227

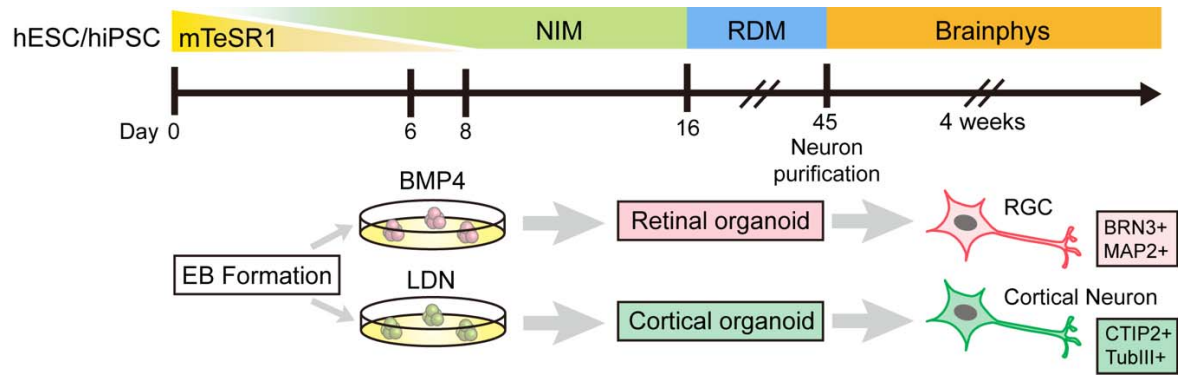

1228

1229 **Supplemental Figure 4. Schematic diagram outlining the differentiation of RGCs and**

1230 **cortical neurons from hPSCs.**

1231

1232

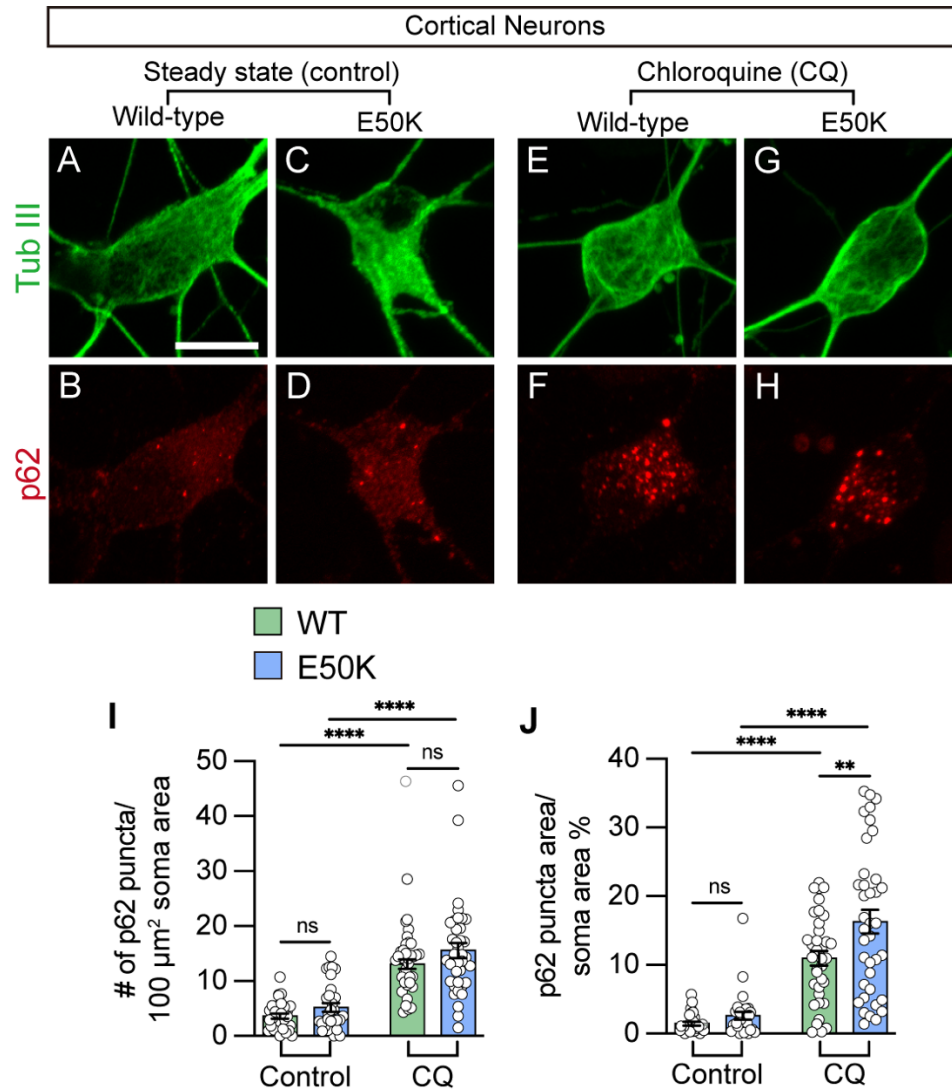

1233

1234 **Supplemental Figure 5. Characterization of p62 expression in hPSC-cortical neurons**

1235 **from wild-type and OPTN(E50K) cell lines. (A-H) Representative images of p62 puncta in**

1236 **iPSC-derived cortical neurons from WT and OPTN(E50K) cell lines under steady state (control)**

1237 **(A-D) and chloroquine (CQ) treatment (E-H). Scale bar: 10  $\mu\text{m}$ . (I-J) Quantification of p62**

1238 **puncta in iPSC-derived cortical neurons (n=3 biological replicates using Ctrl-WT n=30, Ctrl-**

1239 **E50K n=30, CQ-WT n=36 and CQ-E50K n=38 technical replicates; One-way ANOVA, Tukey**

1240 **post hoc test. \*\*\*\*p<0.0001, \*\*p<0.01, ns= not significant, p>0.05). Data are all represented as**

1241 **mean values  $\pm$  S.E.M.**

1242

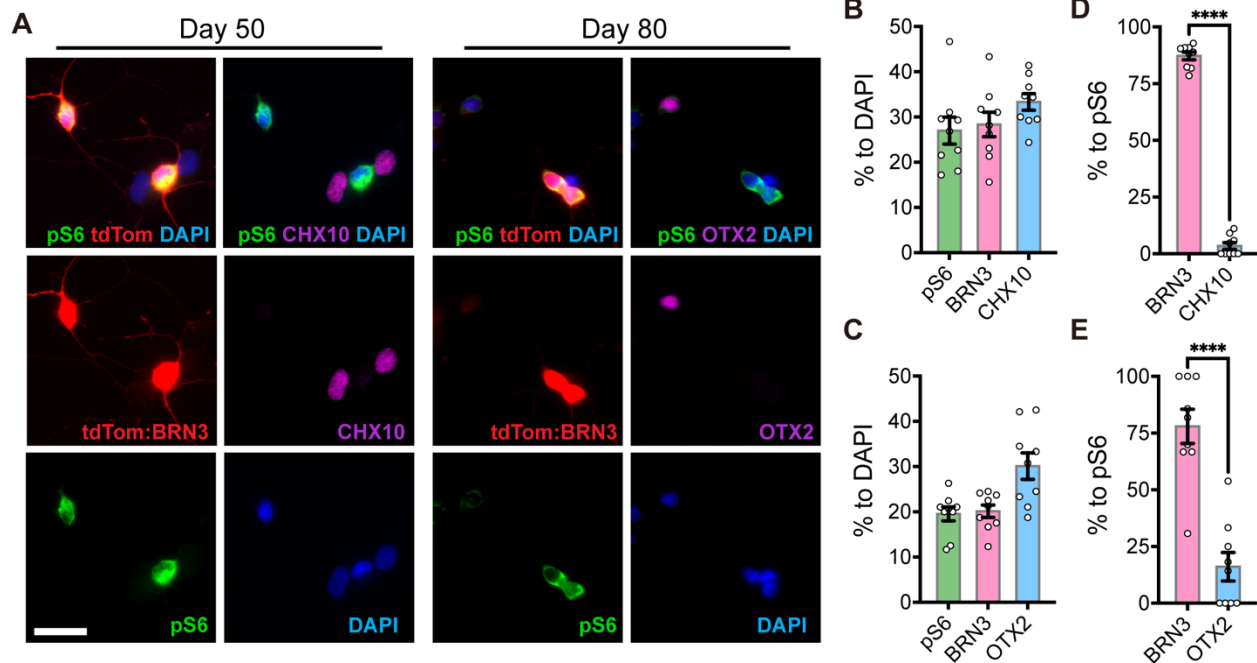

1243

1244 **Supplemental Figure 6. mTORC1 activity is preferentially observed within RGCs among**

1245 **hPSC-derived retinal cells.** (A) Retinal organoids were dissociated and plated onto laminin-

1246 coated coverslips at either day 50 or day 80 of differentiation to acquire the majority of major

1247 retinal cell types, including RGCs (BRN3:tdTomato), retinal progenitor cells (CHX10), and

1248 photoreceptors (OTX2), following by analysis of mTORC1 activity based upon co-staining with

1249 pS6Ser240/244. Scale bar: 25  $\mu$ m. (B-C) Quantification of results showing the percentage of

1250 retinal cell types observed at day 50 or day 80 (n=9 images from three technical replicates). (D-

1251 E) Quantification of pS6Ser240/244 expression colocalized with either BRN3B:tdTomato,

1252 CHX10 or OTX2, suggesting that mTORC1 signaling is highly expressed in RGCs, with little

1253 expression in retinal progenitor cells or photoreceptors (n=9 images from three technical

1254 replicates; t-test, BRN3 vs CHX10:  $p < 0.0001$ , BRN3 vs OTX2:  $p < 0.0001$ ). Data are all

1255 represented as mean values  $\pm$  S.E.M.

1256

1257

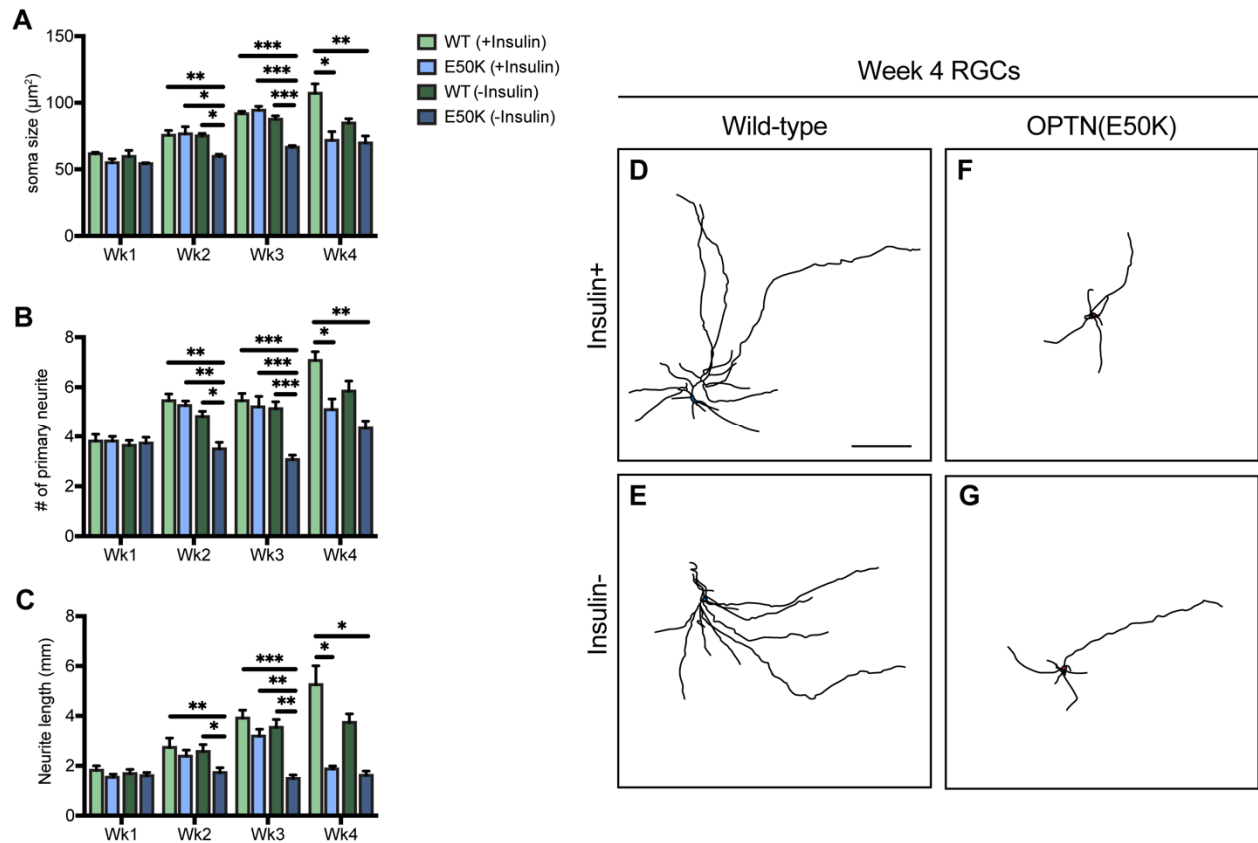

1258

1259

**Supplemental Figure 7. Insulin deprivation expedites the onset of degenerative**

1260

**phenotypes in hPSC-RGCs with the OPTN(E50K) mutation.** (A-C) Quantitative analysis of

1261

neurite measurements over the course of 4 weeks of differentiation in wild-type and

1262

OPTN(E50K) hPSC-RGCs grown with or without insulin, as measured by soma size ( $n \geq 30$  each

1263

condition with 4 biological replicates; One-way ANOVA, Tukey post hoc test.  $***p < 0.001$ ,

1264

$**p < 0.01$ ,  $*p < 0.05$ ) (A), number of primary neurites ( $n \geq 10$  each condition with 4 biological

1265

replicates; One-way ANOVA, Tukey post hoc test.  $***p < 0.001$ ,  $**p < 0.01$ ,  $*p < 0.05$ ) (B), total

1266

neurite length ( $n \geq 10$  each condition with 4 biological replicates; One-way ANOVA, Tukey post

1267

hoc test.  $***p < 0.001$ ,  $**p < 0.01$ ,  $*p < 0.05$ ) (C). Data are all represented as mean values  $\pm$  S.E.M.

1268

(D-G) Representative neurite tracings of WT and OPTN(E50K) hPSC-RGCs after 4 weeks of

1269

growth either with or without insulin. Scale bar: 200  $\mu$ m.

1270

1271



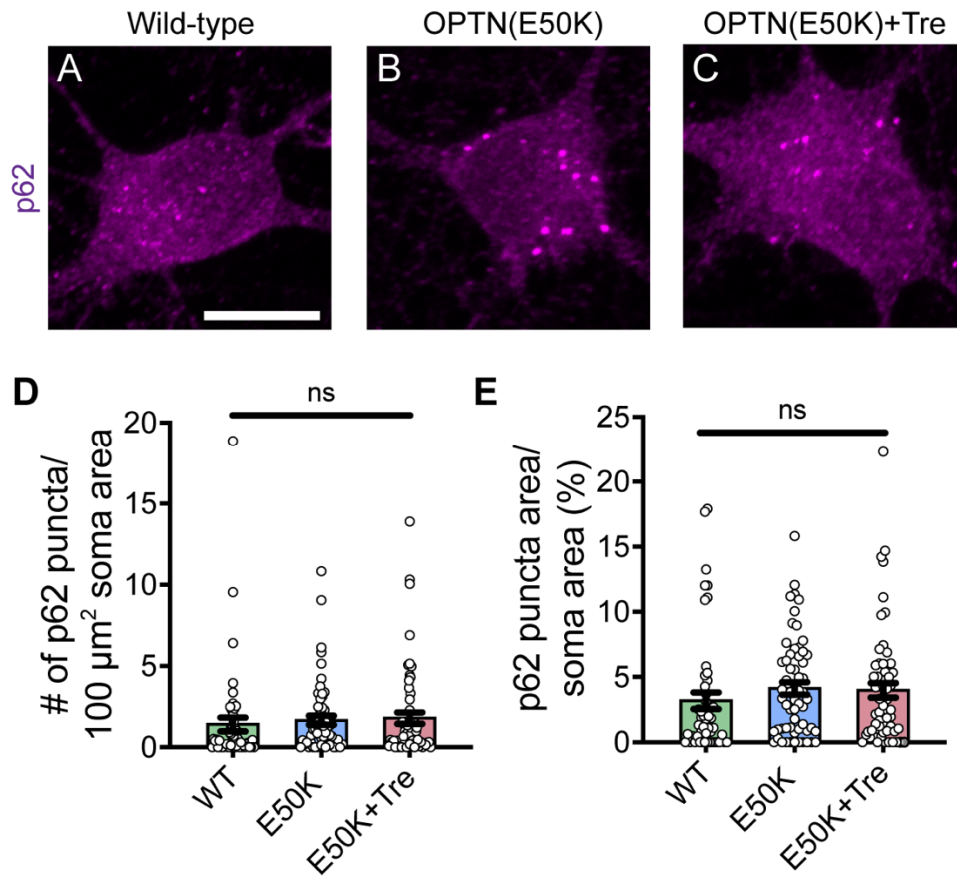

1272

1273 **Supplemental Figure 8. p62 expression remains unchanged in hPSC-RGCs comparing**

1274 **wild-type, OPTN(E50K) and OPTN(E50K) plus trehalose conditions. (A-C) Representative**

1275 images of p62 puncta in hPSC-RGCs. Scale bar: 10  $\mu\text{m}$ . (D-E) Quantification of p62 puncta in

1276 hPSC-RGCs (n=3 biological replicates using WT n=51, E50K n=60, and E50K-trehalose n=61

1277 technical replicates; One-way ANOVA, Tukey post hoc test. ns= not significant,  $p>0.05$ ). Data

1278 are all represented as mean values  $\pm$  S.E.M.

1279

1280

1281 **Supplemental Table. List of antibodies.**

| Antibody       | Type                  | Source                    | Catalog     | RRID        | WB dilution | IF dilution |
|----------------|-----------------------|---------------------------|-------------|-------------|-------------|-------------|
| AKT            | Mouse monoclonal      | Cell Signaling Technology | 2920        | AB_1147620  | 1:2000      |             |
| AMPK           | Rabbit polyclonal     | Cell Signaling Technology | 2532        | AB_330331   | 1:1000      |             |
| $\beta$ -actin | Mouse monoclonal      | Sigma                     | A5441       | AB_476744   | 1:10000     |             |
| BRN3           | Goat polyclonal       | Santa Cruz                | SC-6026     | AB_673441   |             | 1:200       |
| CHX10          | Goat polyclonal       | Santa Cruz                | SC-21690    | AB_2216006  |             | 1:200       |
| CTIP2          | Rat monoclonal        | Abcam                     | Ab18465     | AB_2064130  |             | 1:500       |
| LAMP1          | Rabbit monoclonal     | Cell signaling Technology | 9091        | AB_2687579  | 1:1000      |             |
| LAMP1          | Rat monoclonal        | DSHB                      | 1D4B        | AB_2134500  | 1:200       | 1:20        |
| LC3 A/B        | Rabbit monoclonal     | Cell Signaling Technology | 12741       | AB_2617131  | 1:1000      |             |
| MAP1LC3A       | Rabbit monoclonal     | Abcam                     | ab185036    | AB_881226   |             | 1:200       |
| MAP2           | Mouse monoclonal      | Synaptic Systems          | 188011      | AB_11042001 |             | 1:200       |
| OPTN           | Rabbit polyclonal     | Novus                     | NBP1-84682  | AB_11032496 | 1:1000      | 1:200       |
| OTX2           | Goat polyclonal       | R&D Systems               | AF1979      | AB_2157172  |             | 1:2000      |
| p62            | Mouse monoclonal      | Abcam                     | ab56416     | AB_945626   | 1:2000      | 1:50        |
| pAKT           | Rabbit monoclonal     | Cell Signaling Technology | 4060        | AB_2315049  | 1:2000      |             |
| pAMPK          | Rabbit monoclonal     | Cell Signaling Technology | 2535        | AB_331250   | 1:1000      |             |
| pS6            | Rabbit polyclonal     | Cell Signaling Technology | 2215        | AB_331682   | 1:1000      | 1:200       |
| RBPMS          | Guinea pig polyclonal | PhosphoSolutions          | 1832-RBPMS  | AB_2492226  |             | 1:500       |
| RFP            | Rabbit polyclonal     | Rockland                  | 600-401-379 | AB_2209751  |             | 1:200       |
| RFP            | Goat polyclonal       | Origene                   | AB1140-100  | AB_2877097  |             | 1:200       |
| RFP            | Mouse monoclonal      | Rockland                  | 200-301-379 | AB_2611063  |             | 1:200       |
| S6             | Rabbit monoclonal     | Cell Signaling Technology | 2217        | AB_331355   | 1:1000      |             |

|                       |                   |           |        |            |  |       |
|-----------------------|-------------------|-----------|--------|------------|--|-------|
| Tubulin, $\beta$ -III | Rabbit polyclonal | Biologend | 802001 | AB_2564645 |  | 1:500 |
|-----------------------|-------------------|-----------|--------|------------|--|-------|

1282
